# Supplementary material
Source: Springer Nature journal article supplement (https://www.springermedizin.de/resource/supplementary/13005_2006_41_MOESM3_ESM.pdf/9626142)

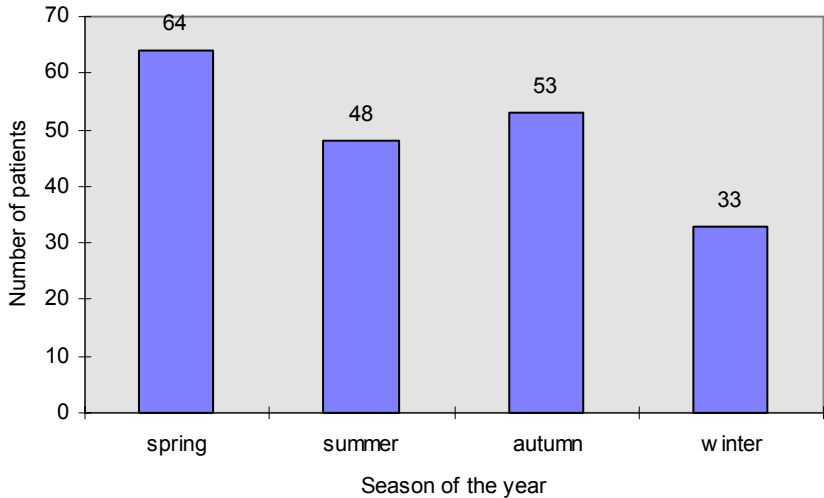

Supplement: MOESM3 [file 9626142]
